# Supplementary material
Source: HighWire-hosted journal article supplement (https://ebn.bmj.com/content/suppl/2006/01/27/7.1)
Supplement: 21Jan05.pdf [file 21Jan05.pdf]

## OTHER ARTICLES NOTED (21 January 2005)

A list of the journals that are reviewed and the criteria for selecting articles from these journals for inclusion in *Evidence-Based Nursing* are included in each issue. The following articles passed all criteria but were not abstracted because, in the judgment of the editors, their findings were less widely applicable to nursing practice, the topic was of interest to only a select group of nurse specialists, or the topic was recently addressed in another abstract.

### Treatment

Porcellati F, Rossetti P, Pampanelli S, *et al.* Better long-term glycaemic control with the basal insulin glargine as compared with NPH in patients with Type 1 diabetes mellitus given meal-time lispro insulin. *Diabet Med* 2004;**21**:1213–20.

[http://www.ncbi.nlm.nih.gov/entrez/query.fcgi?cmd=Retrieve&db=pubmed&dopt=Abstract&list\\_uids=15498088](http://www.ncbi.nlm.nih.gov/entrez/query.fcgi?cmd=Retrieve&db=pubmed&dopt=Abstract&list_uids=15498088)

### Assessment (screening and diagnosis)

Green AD, Colon-Emeric CS, Bastian L, *et al.* Does this woman have osteoporosis? *JAMA* 2004;**292**:2890–900.

[http://www.ncbi.nlm.nih.gov/entrez/query.fcgi?cmd=Retrieve&db=pubmed&dopt=Abstract&list\\_uids=15598921](http://www.ncbi.nlm.nih.gov/entrez/query.fcgi?cmd=Retrieve&db=pubmed&dopt=Abstract&list_uids=15598921)

### Qualitative

Bradley EH, Schlesinger M, Webster TR, *et al.* Translating research into clinical practice: making change happen. *J Am Geriatr Soc* 2004;**52**:1875–82.

[http://www.ncbi.nlm.nih.gov/entrez/query.fcgi?cmd=Retrieve&db=pubmed&dopt=Abstract&list\\_uids=15507065](http://www.ncbi.nlm.nih.gov/entrez/query.fcgi?cmd=Retrieve&db=pubmed&dopt=Abstract&list_uids=15507065)

Connor LH. Relief, risk and renewal: mixed therapy regimens in an Australian suburb. *Soc Sci Med* 2004;**59**:1695–705.

[http://www.ncbi.nlm.nih.gov/entrez/query.fcgi?cmd=Retrieve&db=pubmed&dopt=Abstract&list\\_uids=15279926](http://www.ncbi.nlm.nih.gov/entrez/query.fcgi?cmd=Retrieve&db=pubmed&dopt=Abstract&list_uids=15279926)

Hight NJ, McNair BG, Davenport TA, *et al.* “How much more can we lose?”: carer and family perspectives on living with a person with depression. *Med J Aust* 2004;**181**:S6–9.

[http://www.ncbi.nlm.nih.gov/entrez/query.fcgi?cmd=Retrieve&db=pubmed&dopt=Abstract&list\\_uids=15462644](http://www.ncbi.nlm.nih.gov/entrez/query.fcgi?cmd=Retrieve&db=pubmed&dopt=Abstract&list_uids=15462644)

Hight NJ, McNair BG, Thompson M, *et al.* Experience with treatment services for people with bipolar disorder. *Med J Aust* 2004;**181**:S47–51.

[http://www.ncbi.nlm.nih.gov/entrez/query.fcgi?cmd=Retrieve&db=pubmed&dopt=Abstract&list\\_uids=15462642](http://www.ncbi.nlm.nih.gov/entrez/query.fcgi?cmd=Retrieve&db=pubmed&dopt=Abstract&list_uids=15462642)

Horrocks S, Somerset M, Stoddart H, *et al.* What prevents older people from seeking treatment for urinary incontinence? A qualitative exploration of barriers to the use of community continence services. *Fam Pract* 2004;**21**:689–96.

[http://www.ncbi.nlm.nih.gov/entrez/query.fcgi?cmd=Retrieve&db=pubmed&dopt=Abstract&list\\_uids=15528285](http://www.ncbi.nlm.nih.gov/entrez/query.fcgi?cmd=Retrieve&db=pubmed&dopt=Abstract&list_uids=15528285)

Kirkham SR, Pesut B, Meyerhoff H, *et al.* Spiritual caregiving at the juncture of religion, culture, and state. *Can J Nurs Res* 2004;**36**:148–69.

Molzahn AE, Starzomski R, McDonald M, *et al.* Aboriginal beliefs about organ donation: some Coast Salish viewpoints. *Can J Nurs Res* 2004;**36**:110–28.

Paquette MC, Raine K. Sociocultural context of women's body image. *Soc Sci Med* 2004;**59**:1047–58.

[http://www.ncbi.nlm.nih.gov/entrez/query.fcgi?cmd=Retrieve&db=pubmed&dopt=Abstract&list\\_uids=15186904](http://www.ncbi.nlm.nih.gov/entrez/query.fcgi?cmd=Retrieve&db=pubmed&dopt=Abstract&list_uids=15186904)

Quirk A, Lelliott P, Seale C. Service users' strategies for managing risk in the volatile environment of an acute psychiatric ward. *Soc Sci Med* 2004;**59**:2573–83.

[http://www.ncbi.nlm.nih.gov/entrez/query.fcgi?cmd=Retrieve&db=pubmed&dopt=Abstract&list\\_uids=15474210](http://www.ncbi.nlm.nih.gov/entrez/query.fcgi?cmd=Retrieve&db=pubmed&dopt=Abstract&list_uids=15474210)

Sinding C, Barnoff L, Grassau P. Homophobia and heterosexism in cancer care: the experiences of lesbians. *Can J Nurs Res* 2004;**36**:170–88.

Staniszewska S, Henderson L. Patients evaluations of their health care: the expression of negative evaluation and the role of adaptive strategies. *Patient Educ Couns* 2004;**55**:185–92.

[http://www.ncbi.nlm.nih.gov/entrez/query.fcgi?cmd=Retrieve&db=pubmed&dopt=Abstract&list\\_uids=15530753](http://www.ncbi.nlm.nih.gov/entrez/query.fcgi?cmd=Retrieve&db=pubmed&dopt=Abstract&list_uids=15530753)

Thorne SE, Harris SR, Mahoney K, *et al.* The context of health care communication in chronic illness. *Patient Educ Couns* 2004;**54**:299–306.

[http://www.ncbi.nlm.nih.gov/entrez/query.fcgi?cmd=Retrieve&db=pubmed&dopt=Abstract&list\\_uids=15324981](http://www.ncbi.nlm.nih.gov/entrez/query.fcgi?cmd=Retrieve&db=pubmed&dopt=Abstract&list_uids=15324981)

van Steenkiste B, van der Weijden T, Timmermans D, *et al.* Patients' ideas, fears and expectations of their coronary risk: barriers for primary prevention. *Patient Educ Couns* 2004;**55**:301–7.

[http://www.ncbi.nlm.nih.gov/entrez/query.fcgi?cmd=Retrieve&db=pubmed&dopt=Abstract&list\\_uids=15530768](http://www.ncbi.nlm.nih.gov/entrez/query.fcgi?cmd=Retrieve&db=pubmed&dopt=Abstract&list_uids=15530768)

Williams AM, Irurita VF. Therapeutic and non-therapeutic interpersonal interactions: the patient's perspective. *J Clin Nurs* 2004;**13**:806–15.

[http://www.ncbi.nlm.nih.gov/entrez/query.fcgi?cmd=Retrieve&db=pubmed&dopt=Abstract&list\\_uids=15361154](http://www.ncbi.nlm.nih.gov/entrez/query.fcgi?cmd=Retrieve&db=pubmed&dopt=Abstract&list_uids=15361154)

Winterbottom A, Harcourt D. Patients' experience of the diagnosis and treatment of skin cancer. *J Adv Nurs* 2004;**48**:226–33.

[http://www.ncbi.nlm.nih.gov/entrez/query.fcgi?cmd=Retrieve&db=pubmed&dopt=Abstract&list\\_uids=15488036](http://www.ncbi.nlm.nih.gov/entrez/query.fcgi?cmd=Retrieve&db=pubmed&dopt=Abstract&list_uids=15488036)
